# Supplementary material for: Oilseed Rape Shares Abundant and Generalized Pollinators with Its Co-Flowering Plant Species
Source: MDPI journal article supplement (doi:10.3390/insects12121096), 2021-12-08
Supplement: s1 [file s1]

## SUPPLEMENTARY MATERIALS

**Figure S1.** Results from Müller's Index calculated using the PAC function in R. Index ranges from 0 to 1 with 0 indicating no shared visitors (no influence) to 1, diet of all visitors depends on the acting plant. The values for *Brassica napus*' effect on plants in the community (a) and the effect of other plant species on *Brassica napus* (b).

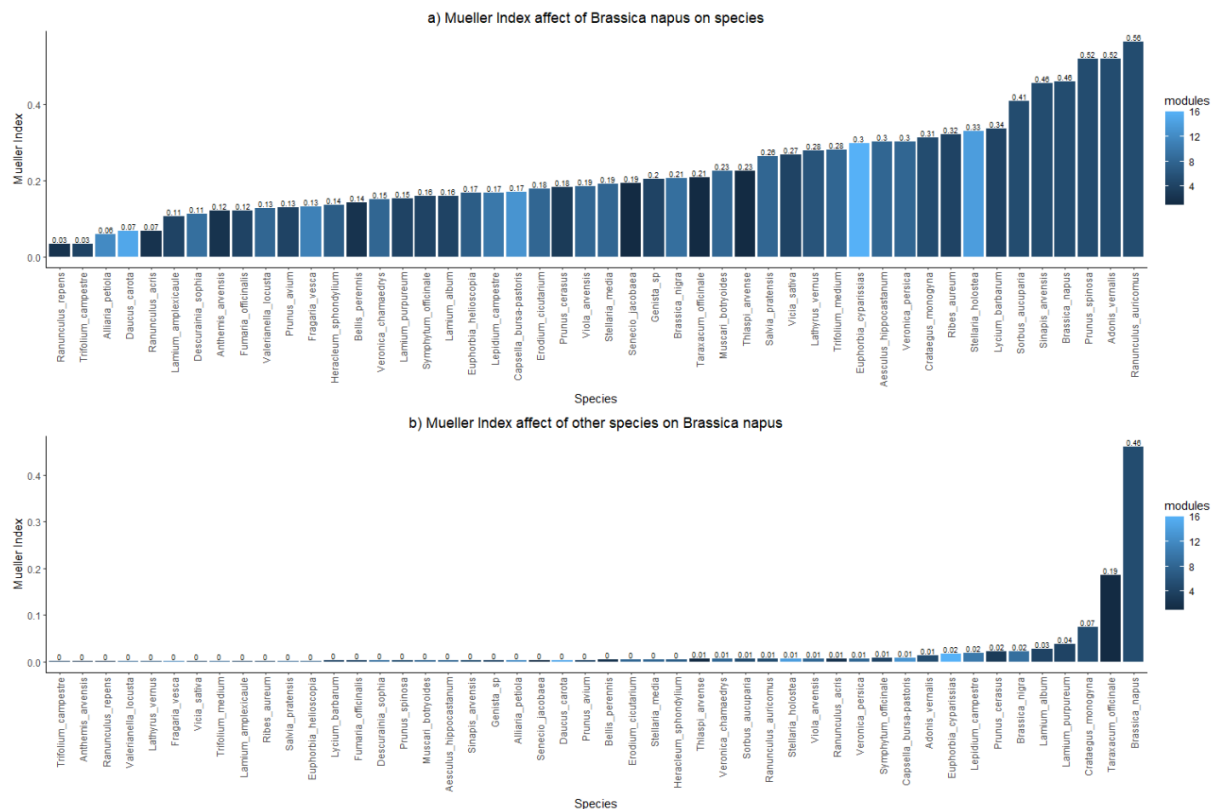

**Table S1.** Information of sites sampled including coordinates (WGS84), the number of interactions (Int), pollinator species (Pol), plant species (Pl) and time spent sampling (hours:minutes) at each site.

| Site         | ID   | Lat      | Long     | Int | Pol | Pl | Time Sampled |
|--------------|------|----------|----------|-----|-----|----|--------------|
| Friedeberg   | FRI1 | 51.62053 | 11.72198 | 108 | 38  | 13 | 4:38         |
| Friedeberg   | FRI2 | 51.62335 | 11.73013 | 86  | 29  | 10 | 3:54         |
| Friedeberg   | FRI3 | 51.63262 | 11.70642 | 141 | 48  | 16 | 4:30         |
| Greifenhagen | GRE1 | 51.62443 | 11.4552  | 166 | 43  | 13 | 4:45         |
| Greifenhagen | GRE2 | 51.62147 | 11.45708 | 26  | 12  | 4  | 0:40         |
| Greifenhagen | GRE3 | 51.61945 | 11.43882 | 197 | 36  | 15 | 4:35         |
| Greifenhagen | GRE4 | 51.64473 | 11.43882 | 172 | 44  | 15 | 5:12         |
| Harsleben    | HAR1 | 51.85657 | 11.07052 | 125 | 22  | 9  | 3:39         |
| Harsleben    | HAR2 | 51.83783 | 11.05842 | 41  | 6   | 4  | 0:56         |
| Harsleben    | HAR3 | 51.8536  | 11.08758 | 157 | 40  | 15 | 4:23         |
| Harsleben    | HAR4 | 51.8259  | 11.067   | 71  | 14  | 8  | 2:13         |
| Siptenfelde  | SIP1 | 51.6543  | 11.03887 | 195 | 29  | 7  | 3:43         |
| Siptenfelde  | SIP2 | 51.63853 | 11.0606  | 182 | 39  | 13 | 4:01         |
| Siptenfelde  | SIP3 | 51.6365  | 11.05487 | 164 | 22  | 9  | 3:50         |
| Schafstädt   | SST1 | 51.38192 | 11.71798 | 147 | 36  | 13 | 4:30         |
| Schafstädt   | SST2 | 51.37763 | 11.72055 | 94  | 24  | 11 | 2:55         |
| Schafstädt   | SST3 | 51.35478 | 11.73462 | 237 | 25  | 9  | 3:30         |
| Wanzleben    | WAN1 | 52.09462 | 11.4175  | 143 | 33  | 16 | 4:20         |
| Wanzleben    | WAN2 | 52.09283 | 11.4278  | 178 | 27  | 9  | 4:18         |
| Wanzleben    | WAN3 | 52.08375 | 11.41837 | 148 | 31  | 10 | 3:44         |

**Table S2.** Extrapolated species richness based on number of individuals (for pollinators) and number of interactions sampled using specpool in the vegan package. Observed richness; Estimated richness with Chao1 estimator; Standard error with Chao1 estimator; Sampling completeness (Observed richness/Estimated richness x 100  $\pm$  Standard Error) for plant species, pollinator species and interactions of both.

|                    | Observed Richness | Estimated Richness | Standard Error | Sampling Completeness (%) |
|--------------------|-------------------|--------------------|----------------|---------------------------|
| Pollinator Species | 189               | 281.75             | 27.02          | 61.21-74.19               |
| Interactions       | 567               | 1836.55            | 202.58         | 27.81-34.70               |

**Table S3.** Relative abundance of functional groups for a) plants and b) pollinators used in analyses. Relative abundance was calculated as number of interactions observed for a functional group divided by total number of interactions in network; then multiplied by 100 for a percentage.

a) Plant functional groups

| <b>Flower Type</b>           | <b>Relative abundance</b> |
|------------------------------|---------------------------|
| Bell                         | 1.80 %                    |
| Disk with Hidden Nectar (HN) | 46.04 %                   |
| Disk with Open Nectar (ON)   | 10.44 %                   |
| Flag Blossoms                | 1.19 %                    |
| Flower Head                  | 25.23 %                   |
| Funnel                       | 0.14 %                    |
| Lip                          | 14.33 %                   |
| Pollen                       | 0.68 %                    |
| Stalk Disk                   | 0.14 %                    |

b) Pollinator functional groups

| <b>Pollinator group</b> | <b>Relative abundance</b> |
|-------------------------|---------------------------|
| Bumblebee               | 19.44 %                   |
| Coleoptera              | 13.46 %                   |
| Honeybee                | 13.00 %                   |
| Hoverfly                | 5.94 %                    |
| Lepidoptera             | 3.42 %                    |
| Other_fly               | 17.93 %                   |
| Wasp                    | 4.28 %                    |
| Wild_bee                | 22.53 %                   |

**Table S4.** List of 48 plant species (in alphabetical order) found in our study along with information for each on its flower type, the number of interactions with pollinators observed, and its module. Each plant is given a short ID, and these IDs are used in Figure 4, which shows network modularity.

| ID   | Plant                          | Flower type  | Interactions | (Percentage) | Module |
|------|--------------------------------|--------------|--------------|--------------|--------|
| P_01 | <i>Adonis vernalis</i>         | Pollen       | 19           | (0.68)       | 5      |
| P_02 | <i>Aesculus hippocastanum</i>  | Lip          | 6            | (0.22)       | 8      |
| P_03 | <i>Alliaria petiolaris</i>     | Disk_HN      | 32           | (1.15)       | 12     |
| P_04 | <i>Anthemis arvensis</i>       | FlowerHead   | 2            | (0.07)       | 2      |
| P_05 | <i>Bellis perennis</i>         | FlowerHead   | 21           | (0.76)       | 2      |
| P_06 | <i>Brassica napus</i>          | Disk_HN      | 747          | (26.89)      | 5      |
| P_07 | <i>Brassica nigra</i>          | Disk_HN      | 82           | (2.95)       | 9      |
| P_08 | <i>Capsella bursa-pastoris</i> | Disk_HN      | 37           | (1.33)       | 13     |
| P_09 | <i>Crataegus monogyna</i>      | Disk_ON      | 179          | (6.44)       | 5      |
| P_10 | <i>Daucus carota</i>           | Disk_ON      | 35           | (1.26)       | 15     |
| P_11 | <i>Descurainia sophia</i>      | Disk_HN      | 13           | (0.47)       | 9      |
| P_12 | <i>Erodium cicutarium</i>      | Disk_HN      | 17           | (0.61)       | 8      |
| P_13 | <i>Euphorbia cyparissias</i>   | Disk_ON      | 40           | (1.44)       | 16     |
| P_14 | <i>Euphorbia helioscopia</i>   | Disk_ON      | 7            | (0.25)       | 7      |
| P_15 | <i>Fragaria vesca</i>          | Disk_HN      | 5            | (0.18)       | 11     |
| P_16 | <i>Fumaria officinalis</i>     | FlagBlossoms | 12           | (0.43)       | 4      |
| P_17 | <i>Genista sp</i>              | FlagBlossoms | 9            | (0.32)       | 4      |
| P_18 | <i>Heracleum sphondylium</i>   | Disk_ON      | 25           | (0.90)       | 7      |
| P_19 | <i>Lamium album</i>            | Lip          | 123          | (4.43)       | 4      |
| P_20 | <i>Lamium amplexicaule</i>     | Lip          | 8            | (0.29)       | 4      |
| P_21 | <i>Lamium purpureum</i>        | Lip          | 188          | (6.77)       | 4      |
| P_22 | <i>Lathyrus vernus</i>         | FlagBlossoms | 2            | (0.07)       | 6      |
| P_23 | <i>Lepidium campestre</i>      | Disk_HN      | 79           | (2.84)       | 10     |
| P_24 | <i>Lycium barbarum</i>         | StalkDisk    | 4            | (0.14)       | 4      |
| P_25 | <i>Muscari botryoides</i>      | Bell         | 8            | (0.29)       | 8      |
| P_26 | <i>Prunus avium</i>            | Disk_HN      | 19           | (0.68)       | 4      |
| P_27 | <i>Prunus cerasus</i>          | Disk_HN      | 92           | (3.31)       | 3      |
| P_28 | <i>Prunus spinosa</i>          | Disk_HN      | 3            | (0.11)       | 5      |
| P_29 | <i>Ranunculus acris</i>        | Disk_HN      | 72           | (2.59)       | 2      |
| P_30 | <i>Ranunculus auricomus</i>    | Disk_HN      | 8            | (0.29)       | 5      |
| P_31 | <i>Ranunculus repens</i>       | Disk_HN      | 14           | (0.50)       | 2      |
| P_32 | <i>Ribes aureum</i>            | Bell         | 3            | (0.11)       | 4      |
| P_33 | <i>Salvia pratensis</i>        | Lip          | 4            | (0.14)       | 8      |

|      |                             |              |     |         |    |
|------|-----------------------------|--------------|-----|---------|----|
| P 34 | <i>Senecio jacobaea</i>     | FlowerHead   | 12  | (0.43)  | 1  |
| P 35 | <i>Sinapis arvensis</i>     | Disk_ON      | 4   | (0.14)  | 5  |
| P 36 | <i>Sorbus aucuparia</i>     | Disk_HN      | 10  | (0.36)  | 5  |
| P 37 | <i>Stellaria holostea</i>   | Disk_HN      | 14  | (0.50)  | 14 |
| P 38 | <i>Stellaria media</i>      | Disk_HN      | 17  | (0.61)  | 8  |
| P 39 | <i>Symphytum officinale</i> | Bell         | 39  | (1.40)  | 4  |
| P 40 | <i>Taraxacum officinale</i> | FlowerHead   | 666 | (23.97) | 1  |
| P 41 | <i>Thlaspi arvense</i>      | Disk_HN      | 18  | (0.65)  | 1  |
| P 42 | <i>Trifolium campestre</i>  | FlagBlossoms | 4   | (0.14)  | 4  |
| P 43 | <i>Trifolium medium</i>     | FlagBlossoms | 3   | (0.11)  | 8  |
| P 44 | <i>Valerianella locusta</i> | Funnel       | 4   | (0.14)  | 8  |
| P 45 | <i>Veronica chamaedrys</i>  | Lip          | 27  | (0.97)  | 8  |
| P 46 | <i>Veronica persica</i>     | Lip          | 17  | (0.61)  | 8  |
| P 47 | <i>Vicia sativa</i>         | FlagBlossoms | 3   | (0.11)  | 4  |
| P 48 | <i>Viola arvensis</i>       | Lip          | 25  | (0.90)  | 8  |

**Table S5.** List of 189 pollinators (in alphabetical order) observed in our study at the highest level of identification along with information for each on its functional group, the number of interactions with plants observed, and its module. Each pollinator is given a short ID, and these IDs are used in Figure 4, which shows network modularity.

| <b>ID</b> | <b>Pollinator</b>             | <b>Pollinator Group</b> | <b>Interactions</b> | <b>(Percentage)</b> | <b>Module</b> |
|-----------|-------------------------------|-------------------------|---------------------|---------------------|---------------|
| I_01      | Adelidae                      | Lepidoptera             | 34                  | (1.22)              | 12            |
| I_02      | <i>Aglais io</i>              | Lepidoptera             | 11                  | (0.4)               | 1             |
| I_03      | <i>Alocerus sp</i>            | Coleoptera              | 1                   | (0.04)              | 7             |
| I_04      | <i>Altica sp</i>              | Coleoptera              | 2                   | (0.07)              | 16            |
| I_05      | <i>Ampedus rufipennis</i>     | Coleoptera              | 1                   | (0.04)              | 15            |
| I_06      | <i>Anatis ocellata</i>        | Coleoptera              | 6                   | (0.22)              | 5             |
| I_07      | <i>Andrena alfkenella</i>     | Wild_bee                | 1                   | (0.04)              | 5             |
| I_08      | <i>Andrena chrysosceles</i>   | Wild_bee                | 4                   | (0.14)              | 1             |
| I_09      | <i>Andrena cineraria</i>      | Wild_bee                | 165                 | (5.94)              | 1             |
| I_10      | <i>Andrena dorsata</i>        | Wild_bee                | 2                   | (0.07)              | 5             |
| I_11      | <i>Andrena flavipes</i>       | Wild_bee                | 74                  | (2.66)              | 1             |
| I_12      | <i>Andrena floricola</i>      | Wild_bee                | 5                   | (0.18)              | 10            |
| I_13      | <i>Andrena fucata</i>         | Wild_bee                | 1                   | (0.04)              | 1             |
| I_14      | <i>Andrena fulva</i>          | Wild_bee                | 2                   | (0.07)              | 4             |
| I_15      | <i>Andrena gravaida</i>       | Wild_bee                | 8                   | (0.29)              | 1             |
| I_16      | <i>Andrena haemorrhoa</i>     | Wild_bee                | 44                  | (1.58)              | 1             |
| I_17      | <i>Andrena helvola</i>        | Wild_bee                | 8                   | (0.29)              | 5             |
| I_18      | <i>Andrena labiata</i>        | Wild_bee                | 1                   | (0.04)              | 8             |
| I_19      | <i>Andrena minutula</i>       | Wild_bee                | 3                   | (0.11)              | 13            |
| I_20      | <i>Andrena minutuloides</i>   | Wild_bee                | 4                   | (0.14)              | 11            |
| I_21      | <i>Andrena nigroaenea</i>     | Wild_bee                | 29                  | (1.04)              | 5             |
| I_22      | <i>Andrena nitida</i>         | Wild_bee                | 6                   | (0.22)              | 1             |
| I_23      | <i>Andrena scotica</i>        | Wild_bee                | 2                   | (0.07)              | 3             |
| I_24      | <i>Andrena strommella</i>     | Wild_bee                | 6                   | (0.22)              | 1             |
| I_25      | <i>Andrena subopaca</i>       | Wild_bee                | 2                   | (0.07)              | 8             |
| I_26      | <i>Andrena synadelpha</i>     | Wild_bee                | 1                   | (0.04)              | 5             |
| I_27      | <i>Andrena vaga</i>           | Wild_bee                | 1                   | (0.04)              | 1             |
| I_28      | <i>Andrena varians</i>        | Wild_bee                | 1                   | (0.04)              | 3             |
| I_29      | <i>Andrena viridescens</i>    | Wild_bee                | 3                   | (0.11)              | 8             |
| I_30      | <i>Anthaxia nitidula</i>      | Coleoptera              | 12                  | (0.43)              | 16            |
| I_31      | <i>Anthocharis cardamines</i> | Lepidoptera             | 2                   | (0.07)              | 9             |
| I_32      | Anthomyiidae                  | Other_fly               | 60                  | (2.16)              | 5             |
| I_33      | <i>Anthophora plumipes</i>    | Wild_bee                | 41                  | (1.48)              | 4             |

|      |                                  |             |     |         |    |
|------|----------------------------------|-------------|-----|---------|----|
| I 34 | <i>Apis mellifera</i>            | Honeybee    | 361 | (12.99) | 5  |
| I 35 | <i>Araschnia levana</i>          | Lepidoptera | 1   | (0.04)  | 2  |
| I 36 | Asilidae                         | Other_fly   | 2   | (0.07)  | 10 |
| I 37 | <i>Athalia rosae</i>             | Wasp        | 1   | (0.04)  | 10 |
| I 38 | Bibionidae                       | Other_fly   | 40  | (1.44)  | 3  |
| I 39 | <i>Bombus dark form complex</i>  | Bumblebee   | 9   | (0.32)  | 5  |
| I 40 | <i>Bombus hortorum</i>           | Bumblebee   | 1   | (0.04)  | 4  |
| I 41 | <i>Bombus hypnorum</i>           | Bumblebee   | 1   | (0.04)  | 5  |
| I 42 | <i>Bombus lapidarius</i>         | Bumblebee   | 1   | (0.04)  | 5  |
| I 43 | <i>Bombus pascuorum</i>          | Bumblebee   | 235 | (8.46)  | 4  |
| I 44 | <i>Bombus pratorum</i>           | Bumblebee   | 5   | (0.18)  | 4  |
| I 45 | <i>Bombus red-tail complex</i>   | Bumblebee   | 46  | (1.66)  | 5  |
| I 46 | <i>Bombus terrestris</i>         | Bumblebee   | 4   | (0.14)  | 4  |
| I 47 | <i>Bombus terrestris complex</i> | Bumblebee   | 238 | (8.57)  | 4  |
| I 48 | <i>Bombylius major</i>           | Other_fly   | 121 | (4.36)  | 8  |
| I 49 | <i>Brachyderini sp 1</i>         | Coleoptera  | 2   | (0.07)  | 16 |
| I 50 | <i>Brachyderini sp 2</i>         | Coleoptera  | 1   | (0.04)  | 1  |
| I 51 | <i>Byturus ochraceus</i>         | Coleoptera  | 35  | (1.26)  | 2  |
| I 52 | Calliphoridae                    | Other_fly   | 17  | (0.61)  | 7  |
| I 53 | <i>Cantharis fusca</i>           | Coleoptera  | 13  | (0.47)  | 15 |
| I 54 | <i>Cephus brachycerus</i>        | Wasp        | 32  | (1.15)  | 2  |
| I 55 | <i>Cephus pygmeus</i>            | Wasp        | 56  | (2.02)  | 9  |
| I 56 | <i>Ceratina cyanea</i>           | Wild_bee    | 2   | (0.07)  | 2  |
| I 57 | <i>Cetonia aurata</i>            | Coleoptera  | 32  | (1.15)  | 5  |
| I 58 | <i>Cheilosia illustrata</i>      | Hoverfly    | 1   | (0.04)  | 10 |
| I 59 | <i>Cheilosia latifrons</i>       | Hoverfly    | 12  | (0.43)  | 2  |
| I 60 | <i>Cheilosia vicina</i>          | Hoverfly    | 2   | (0.07)  | 2  |
| I 61 | <i>Chelostoma florissomne</i>    | Wild_bee    | 1   | (0.04)  | 2  |
| I 62 | <i>Chrysanthia sp</i>            | Coleoptera  | 1   | (0.04)  | 1  |
| I 63 | <i>Chrysomela aenea</i>          | Coleoptera  | 2   | (0.07)  | 4  |
| I 64 | <i>Chrysotoxum cautum</i>        | Hoverfly    | 9   | (0.32)  | 10 |
| I 65 | <i>Chrysotoxum festivum</i>      | Hoverfly    | 2   | (0.07)  | 15 |
| I 66 | <i>Cladius pectinicornis</i>     | Wasp        | 1   | (0.04)  | 5  |
| I 67 | <i>Coccinella septempunctata</i> | Coleoptera  | 6   | (0.22)  | 5  |
| I 68 | <i>Coenonympha pamphilus</i>     | Lepidoptera | 11  | (0.4)   | 10 |
| I 69 | <i>Colias alfacariensis</i>      | Lepidoptera | 1   | (0.04)  | 1  |
| I 70 | <i>Colletes cunicularius</i>     | Wild_bee    | 6   | (0.22)  | 3  |
| I 71 | Collyriinae                      | Wasp        | 1   | (0.04)  | 10 |
| I 72 | Conopidae                        | Other_fly   | 5   | (0.18)  | 3  |
| I 73 | <i>Dasysyrphus albostriatus</i>  | Hoverfly    | 2   | (0.07)  | 1  |
| I 74 | <i>Dasysyrphus tricinctus</i>    | Hoverfly    | 4   | (0.14)  | 1  |



|       |                                   |             |     |        |    |
|-------|-----------------------------------|-------------|-----|--------|----|
| I 75  | <i>Dasysyrphus venustrus</i>      | Hoverfly    | 2   | (0.07) | 3  |
| I 76  | <i>Dasytes virens</i>             | Coleoptera  | 1   | (0.04) | 5  |
| I 77  | <i>Dinoptera collaris</i>         | Coleoptera  | 2   | (0.07) | 10 |
| I 78  | Dixidae                           | Other_fly   | 7   | (0.25) | 1  |
| I 79  | Elateridae                        | Coleoptera  | 33  | (1.19) | 15 |
| I 80  | <i>Elinora koehleri</i>           | Wasp        | 3   | (0.11) | 13 |
| I 81  | <i>Ematurga atomaria</i>          | Lepidoptera | 1   | (0.04) | 1  |
| I 82  | Empididae                         | Other_fly   | 171 | (6.16) | 1  |
| I 83  | Entiminae                         | Coleoptera  | 3   | (0.11) | 1  |
| I 84  | <i>Epistrophe eligans</i>         | Hoverfly    | 1   | (0.04) | 5  |
| I 85  | <i>Episyrphus balteatus</i>       | Hoverfly    | 1   | (0.04) | 5  |
| I 86  | <i>Eristalis arbustorum</i>       | Hoverfly    | 1   | (0.04) | 13 |
| I 87  | <i>Eristalis horticola</i>        | Hoverfly    | 1   | (0.04) | 14 |
| I 88  | <i>Eristalis jugorum</i>          | Hoverfly    | 1   | (0.04) | 1  |
| I 89  | <i>Eristalis similis</i>          | Hoverfly    | 1   | (0.04) | 10 |
| I 90  | <i>Eristalis tenax</i>            | Hoverfly    | 6   | (0.22) | 5  |
| I 91  | <i>Eucera nigrescens</i>          | Wild_bee    | 1   | (0.04) | 6  |
| I 92  | <i>Eupeodes corollae</i>          | Hoverfly    | 1   | (0.04) | 10 |
| I 93  | <i>Eupeodes luniger</i>           | Hoverfly    | 1   | (0.04) | 5  |
| I 94  | <i>Gnorimus variabilis</i>        | Coleoptera  | 1   | (0.04) | 5  |
| I 95  | <i>Gonepteryx rhamni</i>          | Lepidoptera | 3   | (0.11) | 9  |
| I 96  | <i>Halictus maculatus</i>         | Wild_bee    | 3   | (0.11) | 7  |
| I 97  | <i>Halictus scabiosae</i>         | Wild_bee    | 2   | (0.07) | 10 |
| I 98  | <i>Halictus tumulorum</i>         | Wild_bee    | 10  | (0.36) | 5  |
| I 99  | <i>Helophilus pendulus</i>        | Hoverfly    | 2   | (0.07) | 1  |
| I 100 | Ichneumoninae                     | Wasp        | 2   | (0.07) | 1  |
| I 101 | <i>Issoria lathonia</i>           | Lepidoptera | 1   | (0.04) | 1  |
| I 102 | <i>Lasioglossum albipes</i>       | Wild_bee    | 1   | (0.04) | 1  |
| I 103 | <i>Lasioglossum calceatum</i>     | Wild_bee    | 18  | (0.65) | 1  |
| I 104 | <i>Lasioglossum fulvicorne</i>    | Wild_bee    | 1   | (0.04) | 16 |
| I 105 | <i>Lasioglossum laevigatum</i>    | Wild_bee    | 1   | (0.04) | 9  |
| I 106 | <i>Lasioglossum lativentre</i>    | Wild_bee    | 1   | (0.04) | 1  |
| I 107 | <i>Lasioglossum lineare</i>       | Wild_bee    | 1   | (0.04) | 8  |
| I 108 | <i>Lasioglossum malachurum</i>    | Wild_bee    | 7   | (0.25) | 1  |
| I 109 | <i>Lasioglossum nitidiusculum</i> | Wild_bee    | 2   | (0.07) | 4  |
| I 110 | <i>Lasioglossum pallens</i>       | Wild_bee    | 1   | (0.04) | 5  |
| I 111 | <i>Lasioglossum parvulum</i>      | Wild_bee    | 3   | (0.11) | 13 |
| I 112 | <i>Lasioglossum pauxillum</i>     | Wild_bee    | 20  | (0.72) | 9  |
| I 113 | <i>Lasioglossum politum</i>       | Wild_bee    | 1   | (0.04) | 5  |
| I 114 | <i>Lasioglossum rufitarse</i>     | Wild_bee    | 1   | (0.04) | 1  |
| I 115 | <i>Lasioglossum sp</i>            | Wild_bee    | 4   | (0.14) | 5  |

|       |                                |             |     |        |    |
|-------|--------------------------------|-------------|-----|--------|----|
| I 116 | <i>Lasioglossum villosulum</i> | Wild_bee    | 1   | (0.04) | 1  |
| I 117 | <i>Leptidea sinapis</i>        | Lepidoptera | 1   | (0.04) | 5  |
| I 118 | <i>Longitarsus sp</i>          | Coleoptera  | 1   | (0.04) | 1  |
| I 119 | <i>Macrophya montana</i>       | Wasp        | 1   | (0.04) | 7  |
| I 120 | <i>Malachius bipustulatus</i>  | Coleoptera  | 10  | (0.36) | 5  |
| I 121 | <i>Melanogaster hirtella</i>   | Hoverfly    | 1   | (0.04) | 1  |
| I 122 | <i>Melanostoma mellinum</i>    | Hoverfly    | 6   | (0.22) | 5  |
| I 123 | <i>Melanostoma scalare</i>     | Hoverfly    | 3   | (0.11) | 1  |
| I 124 | Mordellidae                    | Coleoptera  | 170 | (6.12) | 5  |
| I 125 | Muscidae                       | Other_fly   | 11  | (0.4)  | 9  |
| I 126 | <i>Nomada bifasciata</i>       | Wild_bee    | 14  | (0.5)  | 1  |
| I 127 | <i>Nomada fabriciana</i>       | Wild_bee    | 1   | (0.04) | 1  |
| I 128 | <i>Nomada flava</i>            | Wild_bee    | 5   | (0.18) | 3  |
| I 129 | <i>Nomada flavoguttata</i>     | Wild_bee    | 2   | (0.07) | 1  |
| I 130 | <i>Nomada fucata</i>           | Wild_bee    | 2   | (0.07) | 10 |
| I 131 | <i>Nomada goodeniana</i>       | Wild_bee    | 33  | (1.19) | 1  |
| I 132 | <i>Nomada lathburiana</i>      | Wild_bee    | 4   | (0.14) | 1  |
| I 133 | <i>Nomada marshamella</i>      | Wild_bee    | 7   | (0.25) | 4  |
| I 134 | <i>Nomada panzeri</i>          | Wild_bee    | 12  | (0.43) | 3  |
| I 135 | <i>Nomada ruficornis</i>       | Wild_bee    | 4   | (0.14) | 1  |
| I 136 | <i>Nomada sp</i>               | Wild_bee    | 1   | (0.04) | 8  |
| I 137 | <i>Nomada succincta</i>        | Wild_bee    | 5   | (0.18) | 3  |
| I 138 | <i>Oedemera lurida</i>         | Coleoptera  | 3   | (0.11) | 1  |
| I 139 | <i>Oedemera virescens</i>      | Coleoptera  | 8   | (0.29) | 2  |
| I 140 | <i>Osmia bicolor</i>           | Wild_bee    | 1   | (0.04) | 5  |
| I 141 | <i>Osmia bicornis</i>          | Wild_bee    | 3   | (0.11) | 5  |
| I 142 | <i>Osmia brevicornis</i>       | Wild_bee    | 25  | (0.9)  | 9  |
| I 143 | <i>Pachyprotasis rapae</i>     | Wasp        | 1   | (0.04) | 14 |
| I 144 | <i>Parasyrphus annulatus</i>   | Hoverfly    | 1   | (0.04) | 14 |
| I 145 | <i>Phloeopora sp</i>           | Coleoptera  | 1   | (0.04) | 1  |
| I 146 | <i>Phyllobius sp</i>           | Coleoptera  | 4   | (0.14) | 5  |
| I 147 | <i>Pieris brassicae</i>        | Lepidoptera | 5   | (0.18) | 7  |
| I 148 | <i>Pieris napi</i>             | Lepidoptera | 7   | (0.25) | 9  |
| I 149 | <i>Pipizella divicoi</i>       | Hoverfly    | 1   | (0.04) | 16 |
| I 150 | <i>Pipizella viduata</i>       | Hoverfly    | 2   | (0.07) | 16 |
| I 151 | <i>Pipizella zeneggenesis</i>  | Hoverfly    | 1   | (0.04) | 10 |
| I 152 | <i>Pissodes sp</i>             | Coleoptera  | 3   | (0.11) | 3  |
| I 153 | <i>Platycheirus albimanus</i>  | Hoverfly    | 18  | (0.65) | 8  |
| I 154 | <i>Platycheirus scutatus</i>   | Hoverfly    | 3   | (0.11) | 7  |
| I 155 | <i>Platycheirus sp</i>         | Hoverfly    | 1   | (0.04) | 3  |
| I 156 | <i>Platycheirus tarsalis</i>   | Hoverfly    | 2   | (0.07) | 4  |

|       |                                 |             |    |        |    |
|-------|---------------------------------|-------------|----|--------|----|
| I 157 | <i>Podistra sp</i>              | Coleoptera  | 1  | (0.04) | 2  |
| I 158 | <i>Poecilus cupreus</i>         | Coleoptera  | 1  | (0.04) | 1  |
| I 159 | <i>Poecilus versicolor</i>      | Coleoptera  | 2  | (0.07) | 5  |
| I 160 | <i>Polyommatus bellargus</i>    | Lepidoptera | 3  | (0.11) | 4  |
| I 161 | <i>Pontia edusa</i>             | Lepidoptera | 3  | (0.11) | 4  |
| I 162 | <i>Procræus tiblalis</i>        | Coleoptera  | 1  | (0.04) | 10 |
| I 163 | Pyralidae                       | Lepidoptera | 9  | (0.32) | 14 |
| I 164 | <i>Pyrgus malvae</i>            | Lepidoptera | 2  | (0.07) | 9  |
| I 165 | Rhagionidae                     | Other_fly   | 1  | (0.04) | 5  |
| I 166 | Sarcophagidae                   | Other_fly   | 38 | (1.37) | 5  |
| I 167 | <i>Scaeva selenitica</i>        | Hoverfly    | 5  | (0.18) | 5  |
| I 168 | <i>Sphaerophoria rueppellii</i> | Hoverfly    | 1  | (0.04) | 1  |
| I 169 | <i>Sphaerophoria scripta</i>    | Hoverfly    | 7  | (0.25) | 13 |
| I 170 | <i>Sphecodes albilabris</i>     | Wild_bee    | 2  | (0.07) | 3  |
| I 171 | <i>Sphecodes ephippius</i>      | Wild_bee    | 2  | (0.07) | 1  |
| I 172 | <i>Sphecodes spinulosus</i>     | Wild_bee    | 1  | (0.04) | 15 |
| I 173 | <i>Syrphus ribesii</i>          | Hoverfly    | 21 | (0.76) | 8  |
| I 174 | <i>Syrphus torvus</i>           | Hoverfly    | 35 | (1.26) | 5  |
| I 175 | <i>Syrphus vitripennis</i>      | Hoverfly    | 6  | (0.22) | 5  |
| I 176 | <i>Tachina fera</i>             | Other_fly   | 1  | (0.04) | 1  |
| I 177 | Tachinidae                      | Other_fly   | 19 | (0.68) | 2  |
| I 178 | <i>Tenthredo sulphuripes</i>    | Wasp        | 1  | (0.04) | 5  |
| I 179 | <i>Tenthredo temula</i>         | Wasp        | 1  | (0.04) | 5  |
| I 180 | <i>Tenthredo zonula</i>         | Wasp        | 5  | (0.18) | 7  |
| I 181 | <i>Tenthredopsis sp</i>         | Wasp        | 5  | (0.18) | 10 |
| I 182 | Tipulidae                       | Other_fly   | 3  | (0.11) | 14 |
| I 183 | <i>Tropinota hirta</i>          | Coleoptera  | 12 | (0.43) | 1  |
| I 184 | Tryphoninae                     | Wasp        | 8  | (0.29) | 7  |
| I 185 | Ulidiidae                       | Other_fly   | 2  | (0.07) | 10 |
| I 186 | <i>Valgus hemipterus</i>        | Coleoptera  | 2  | (0.07) | 7  |
| I 187 | <i>Vesperus sp</i>              | Coleoptera  | 1  | (0.04) | 3  |
| I 188 | <i>Vespula rufa</i>             | Wasp        | 1  | (0.04) | 1  |
| I 189 | <i>Xantogramma pedissequum</i>  | Hoverfly    | 1  | (0.04) | 13 |
